# Supplementary material for: Exercise Induced Changes in Salivary and Serum Metabolome in Trained Standardbred, Assessed by 1H-NMR
Source: PubMed Central journal article supplement (PMC7407172; doi:10.3390/metabo10070298), 2020-07-21
Supplement: metabolites-10-00298-s001.pdf [file metabolites-10-00298-s001.pdf]

# Exercise induced changes in salivary and serum metabolomic metabolome in trained standardbred, assessed by <sup>1</sup>H-NMR

## Supplemental material

Table S1: Serum metabolites with no significant difference in concentrations before and after exercise ( $\mu\text{mol/L}$ ; mean  $\pm$  SD).

|                      | T <sub>0</sub>       | T <sub>1</sub>     | <i>p</i> |
|----------------------|----------------------|--------------------|----------|
| Formate              | 4.17 $\pm$ 0.88      | 3.62 $\pm$ 0.73    | 0.07     |
| Phenylalanine        | 16.75 $\pm$ 3.27     | 15.66 $\pm$ 2.68   | 0.17     |
| Tyrosine             | 12.53 $\pm$ 3.81     | 10.80 $\pm$ 1.71   | 0.11     |
| Uridine              | 4.29 $\pm$ 0.63      | 4.09 $\pm$ 1.07    | 0.59     |
| Arabinose            | 9.49 $\pm$ 1.51      | 8.23 $\pm$ 0.94    | 0.05     |
| Serine               | 40.07 $\pm$ 13.64    | 38.76 $\pm$ 11.65  | 0.64     |
| Glycine              | 124.75 $\pm$ 35.40   | 132.87 $\pm$ 36.27 | 0.25     |
| Betaine              | 4.30 $\pm$ 1.64      | 4.57 $\pm$ 1.43    | 0.50     |
| Glucose              | 642.24 $\pm$ 67.69   | 674.23 $\pm$ 97.82 | 0.24     |
| Creatinine           | 12.47 $\pm$ 2.46     | 11.16 $\pm$ 3.17   | 0.20     |
| Sarcosine            | 0.56 $\pm$ 0.20      | 0.50 $\pm$ 0.17    | 0.25     |
| Dimethylamine        | 0.18 $\pm$ 0.08      | 0.18 $\pm$ 0.06    | 0.89     |
| Methionine           | 6.78 $\pm$ 1.36      | 5.80 $\pm$ 1.10    | 0.07     |
| Beta-Alanine         | 2.17 $\pm$ 0.77      | 1.79 $\pm$ 0.65    | 0.12     |
| Arginine             | 26.00 $\pm$ 10.19    | 22.57 $\pm$ 5.17   | 0.22     |
| Acetate              | 107.31 $\pm$ 67.92   | 93.07 $\pm$ 34.07  | 0.29     |
| 2-Hydroxybutyrate    | 136.91 $\pm$ 346.91  | 18.57 $\pm$ 6.99   | 0.26     |
| Ethanol              | 491.69 $\pm$ 1565.43 | 0.76 $\pm$ 1.00    | 0.30     |
| 3-Hydroxyisobutyrate | 5.67 $\pm$ 3.56      | 4.47 $\pm$ 1.40    | 0.17     |
| Isoleucine           | 12.72 $\pm$ 1.55     | 11.82 $\pm$ 1.83   | 0.07     |

Table S2: Salivary metabolites with no significant difference in concentrations before and after exercise ( $\mu\text{mol/L}$ ; mean  $\pm$  SD).

|                        | T <sub>0</sub>        | T <sub>1</sub>       | <i>p</i> |
|------------------------|-----------------------|----------------------|----------|
| 1,3-Dihydroxyacetone   | 4.19 $\pm$ 1.45       | 5.48 $\pm$ 3.54      | 0.23     |
| 2,3-Butanediol         | 12.22 $\pm$ 5.05      | 10.91 $\pm$ 9.74     | 0.70     |
| 2-Hydroxyisobutyrate   | 7.58 $\pm$ 4.81       | 4.74 $\pm$ 4.07      | 0.14     |
| 2-Oxoglutarate         | 14.13 $\pm$ 5.93      | 14.12 $\pm$ 7.69     | 1.00     |
| 2-Oxoisocaproate       | 5.40 $\pm$ 2.31       | 6.05 $\pm$ 1.65      | 0.48     |
| 3-hydroxyisovalerate   | 6.30 $\pm$ 9.79       | 3.95 $\pm$ 7.13      | 0.51     |
| 3-Methyl-2-oxovalerate | 3.88 $\pm$ 1.85       | 5.08 $\pm$ 7.25      | 0.60     |
| Acetate                | 2185.19 $\pm$ 1367.95 | 2445.27 $\pm$ 964.39 | 0.60     |
| Acetoin                | 6.94 $\pm$ 5.62       | 6.37 $\pm$ 8.39      | 0.86     |

|                  |                    |                    |      |
|------------------|--------------------|--------------------|------|
| Acetone          | 5.54 ± 3.19        | 3.96 ± 2.05        | 0.19 |
| Alanine          | 123.83 ± 45.39     | 117.81 ± 44.08     | 0.61 |
| Aspartate        | 28.45 ± 20.30      | 18.01 ± 14.43      | 0.13 |
| Butyrate         | 24.71 ± 9.00       | 27.66 ± 16.93      | 0.60 |
| Choline          | 59.57 ± 12.48      | 48.23 ± 24.31      | 0.19 |
| Dimethyl sulfone | 43.19 ± 43.72      | 45.25 ± 37.14      | 0.70 |
| Dimethylamine    | 1.85 ± 0.88        | 7.66 ± 20.89       | 0.36 |
| Ethanol          | 580.01 ± 1301.87   | 1616.19 ± 4507.75  | 0.47 |
| Formate          | 110.00 ± 49.10     | 111.22 ± 72.76     | 0.96 |
| Glucose          | 630.52 ± 559.92    | 365.43 ± 396.59    | 0.12 |
| Glutamate        | 55.18 ± 24.55      | 57.12 ± 21.30      | 0.64 |
| Glutamine        | 12.64 ± 6.59       | 24.49 ± 26.45      | 0.18 |
| Glycerol         | 11222.05 ± 5298.82 | 11190.73 ± 4916.59 | 0.98 |
| Glycolate        | 41.39 ± 13.79      | 54.44 ± 19.11      | 0.08 |
| Histamine        | 20.83 ± 10.57      | 30.61 ± 26.57      | 0.31 |
| Hydroxyacetone   | 5.27 ± 3.14        | 4.38 ± 6.23        | 0.62 |
| Isoleucine       | 23.47 ± 8.30       | 27.05 ± 8.95       | 0.26 |
| Isovalerate      | 6.64 ± 8.55        | 7.65 ± 6.43        | 0.53 |
| Lactate          | 1290.02 ± 773.99   | 938.65 ± 744.91    | 0.26 |
| Leucine          | 33.06 ± 15.25      | 41.22 ± 16.98      | 0.20 |
| Lysine           | 59.32 ± 20.58      | 64.99 ± 20.82      | 0.55 |
| Methylamine      | 3.98 ± 2.00        | 4.27 ± 4.81        | 0.87 |
| Methylguanidine  | 1.63 ± 0.49        | 2.03 ± 2.03        | 0.53 |
| myo-Inositol     | 65.11 ± 67.42      | 32.10 ± 41.63      | 0.15 |
| Proline          | 61.16 ± 42.52      | 54.98 ± 30.32      | 0.71 |
| Propionate       | 259.00 ± 197.97    | 271.85 ± 125.52    | 0.82 |
| Pyroglutamate    | 46.73 ± 62.22      | 53.45 ± 55.10      | 0.48 |
| Serine           | 79.21 ± 81.02      | 125.95 ± 109.38    | 0.11 |
| Sucrose          | 114.01 ± 198.70    | 257.95 ± 505.73    | 0.38 |
| Taurine          | 114.01 ± 59.95     | 133.11 ± 45.92     | 0.43 |
| Threonine        | 51.18 ± 61.92      | 34.51 ± 42.36      | 0.48 |
| trans-Aconitate  | 23.72 ± 12.24      | 18.58 ± 31.24      | 0.64 |
| Trigonelline     | 5.03 ± 1.48        | 6.16 ± 5.50        | 0.46 |
| Trimethylamine   | 2.23 ± 0.90        | 1.98 ± 1.32        | 0.65 |
| Uracil           | 28.11 ± 9.96       | 46.40 ± 34.84      | 0.13 |
| Uridine          | 37.75 ± 16.11      | 36.63 ± 34.74      | 0.92 |
| Urocanate        | 21.14 ± 9.59       | 36.28 ± 60.57      | 0.43 |
| Valerate         | 8.44 ± 14.02       | 28.10 ± 69.93      | 0.37 |
| Valine           | 28.75 ± 12.49      | 34.58 ± 14.09      | 0.16 |

---
